# Supplementary material for: Cofactor-dependent enzyme catalysis in functionalized ionic solvents
Source: Royal Society of Chemistry journal article supplement (doi:10.1039/b410467f), 2004-01-01
Supplement: b410467f.pdf [file b410467f.pdf]

## Cofactor-dependent enzyme catalysis in functionalized ionic solvents

Adam J. Walker & Neil C. Bruce

### Electronic Supporting Information

#### i.) Structures and analytical data for novel ionic liquids (2 and 4-6)

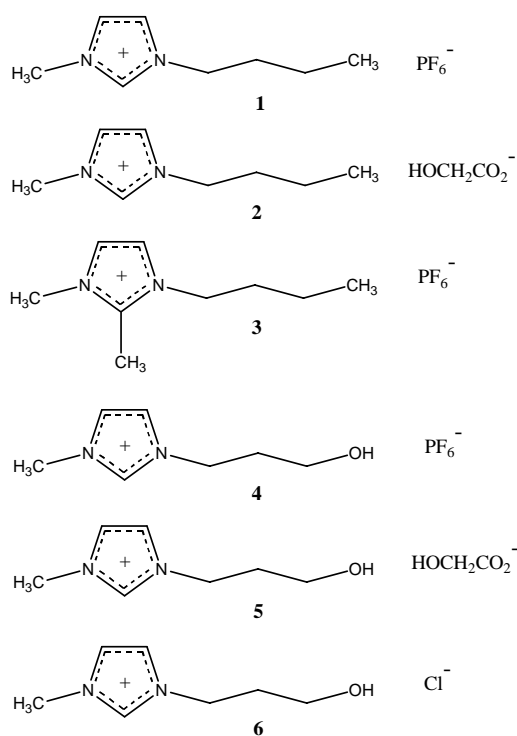

**2:** NMR [ $^1\text{H}$ , 400 MHz,  $d_6$ -DMSO,  $\delta$ (ppm)]: 0.88 (t, 3H,  $J = 10$  Hz,  $\delta$ - $\text{CH}_3$ ), 1.23 (h, 2H,  $J = 20$  Hz,  $\gamma$ - $\text{CH}_2$ ), 1.75 (p, 2H,  $J = 12$  Hz,  $\beta$ - $\text{CH}_2$ ), 3.46 (s, 2H,  $\text{HOCH}_2$ ), 3.85 (s, 3H,  $N$ - $\text{CH}_3$ ), 4.17 (t, 2H,  $J = 6$  Hz,  $\alpha$ - $\text{CH}_2$ ), 4.35 (br. s, 1H, removed by  $\text{D}_2\text{O}$  shake,  $\text{CH}_2\text{OH}$ ). 7.75 (d, 1H,  $J = 2$  Hz, 4- $\text{H}$ ), 7.67 (d, 1H,  $J = 2$  Hz, 5- $\text{H}$ ), 9.43 (br, 1H, reduced by  $\text{D}_2\text{O}$  shake, 2- $\text{H}$ ).

FT-IR [ATR,  $\text{cm}^{-1}$ ]: 3373, 3063, 1169, 1568, 2960, 1464, 753, 1361.

**4:** NMR [ $^1\text{H}$ , 400 MHz,  $d_6$ -DMSO,  $\delta$ (ppm)]: 1.92 (p, 2H,  $J = 16$  Hz,  $\beta$ - $\text{CH}_2$ ), 3.40 (t, 2H,  $J = 5$  Hz,  $\alpha$ - $\text{CH}_2$ ), 3.80 (s, 1H, removed by  $\text{D}_2\text{O}$  shake,  $\text{CH}_2\text{OH}$ ), 3.83 (s, 3H,  $N$ - $\text{CH}_3$ ), 4.21 (t, 2H,  $J = 8$  Hz,  $\gamma$ - $\text{CH}_2$ ), 7.65 (br. d, 1H, 4- $\text{H}$ ), 7.72 (br. d, 1H, 5- $\text{H}$ ), 9.13 (s, 1H, 2- $\text{H}$ ).

FT-IR [ATR,  $\text{cm}^{-1}$ ]: 871, 3382, 1167, 1576, 2963, 559, 624, 1464, 742, 1340.

**5:** NMR [ $^1\text{H}$ , 400 MHz,  $d_6$ -DMSO,  $\delta$  (ppm)]: 1.92 (p, 2H,  $J = 16$  Hz,  $\beta$ - $\text{CH}_2$ ), 2.0 (br. s, 1H  $\text{HOCH}_2\text{CO}_2^-$ ), 3.40 (t, 2H,  $J = 5$  Hz,  $\alpha$ - $\text{CH}_2$ ), 3.52 (s, 2H,  $\text{CH}_2\text{CO}_2^-$ ), 3.75 (br. s, 1H, removed by  $\text{D}_2\text{O}$

shake,  $\text{CH}_2\text{OH}$ ), 3.83 (s, 3H,  $N\text{-CH}_3$ ), 4.21 (t, 2H,  $J = 8$  Hz,  $\gamma\text{-CH}_2$ ), 7.65 (br. d, 1H, 4-H), 7.72 (br. d, 1H, 5-H), 9.13 (s, 1H, 2-H).

FT-IR [ATR,  $\text{cm}^{-1}$ ]: 1731, 1634, 1576, 3390, 1167, 871, 1061, 1088, 1228

**6**: NMR [ $^1\text{H}$ , 400 MHz,  $d_6$ -DMSO,  $\delta(\text{ppm})$ ]: 1.85 (p, 2H,  $J = 16$  Hz,  $\beta\text{-CH}_2$ ), 3.36 (t, 2H,  $J = 5$  Hz,  $\alpha\text{-CH}_2$ ), 3.80 (s, 1H, removed by  $\text{D}_2\text{O}$  shake,  $\text{CH}_2\text{OH}$ ), 3.83 (s, 3H,  $N\text{-CH}_3$ ), 4.18 (t, 2H,  $J = 8$  Hz,  $\gamma\text{-CH}_2$ ), 7.70 (br. d, 1H, 4-H), 7.78 (br. d, 1H, 5-H), 9.38 (s, 1H, reduced by  $\text{D}_2\text{O}$  shake, 2-H).

ii.) Reaction plots

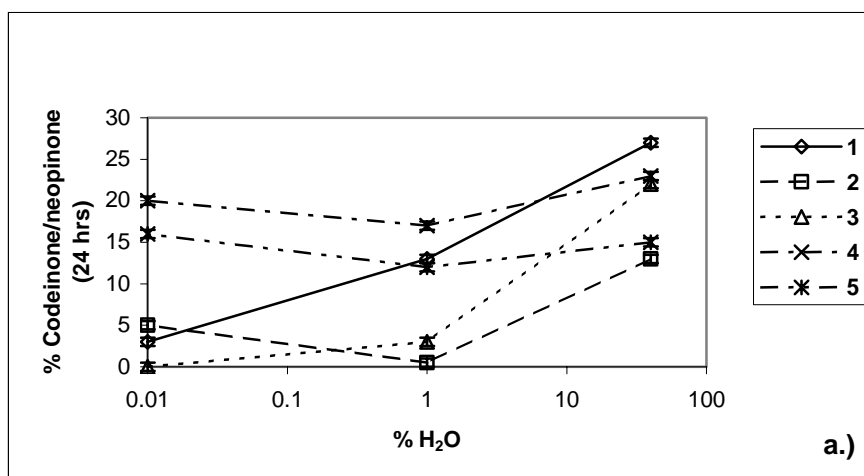

a.) Effect of varying water content on level of accumulated codeinone/neopinone produced from codeine by morphine dehydrogenase after 24 hours in ionic liquids **1-5**. Cofactor recycling was elicited using alcohol dehydrogenase in **1-3**, glucose dehydrogenase in **4 & 5**.

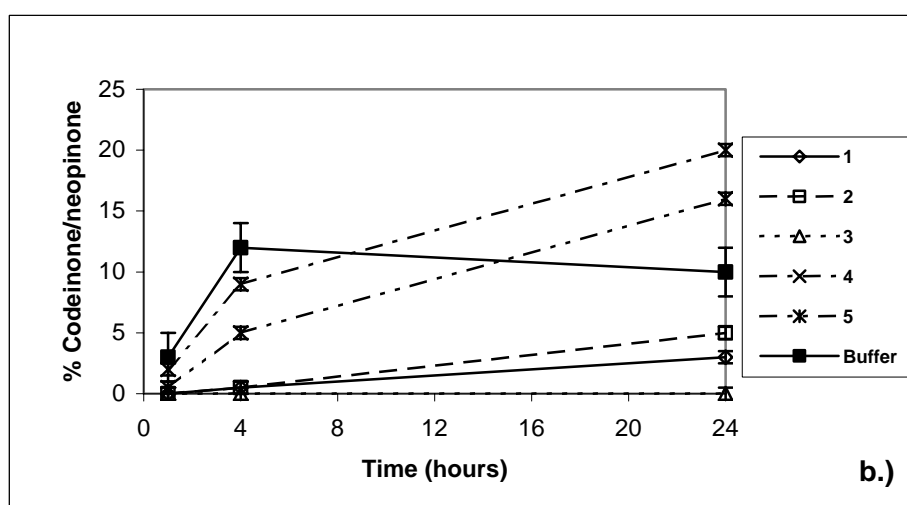

b.) Accumulation of codeinone/neopinone produced from codeine by morphine dehydrogenase in ionic liquids **1-5** and phosphate buffer. RTIL water content < 100 ppm. Cofactor recycling as above.

### iii.) Product analytical data

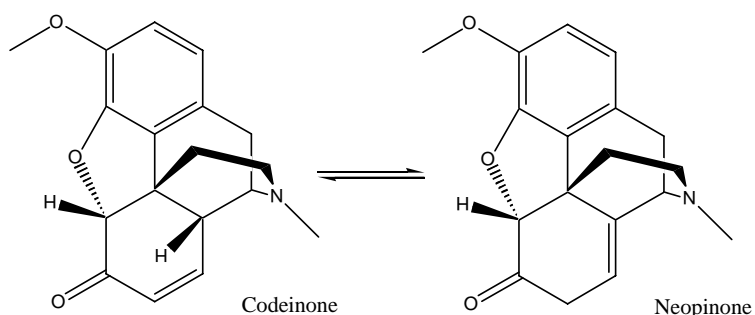

**Codeinone:** NMR [ $^1\text{H}$ , 400 MHz,  $\text{CDCl}_3$ ,  $\delta(\text{ppm})$ ]: 1.81 (d, 1H,  $J = 13$  Hz,  $15\alpha\text{-H}$ ), 2.03 (t, 1H,  $J = 10$  Hz,  $15\beta\text{-H}$ ), 2.28 (m, 2H,  $16\text{-H}_2$ ), 2.42 (s, 3H,  $N\text{-CH}_3$ ), 2.57 (d, 1H,  $J = 16$  Hz,  $10\alpha\text{-H}$ ), 3.08 (d, 1H,  $J = 26$  Hz,  $10\beta\text{-H}$ ), 3.16 (s, 1H,  $9\text{-H}$ ), 3.38 (s, 1H,  $14\text{-H}$ ), 3.81 (s, 3H,  $3\text{-O-CH}_3$ ), 4.67 (s, 1H,  $5\text{-H}$ ), 6.05 (d, 1H,  $J = 14$  Hz,  $7\text{-H}$ ), 6.59 (d, 1H,  $J = 17$  Hz,  $2\text{-H}$ ), 6.63 (m, 2H,  $1\text{-H} + 8\text{-H}$ ).

FT-IR [KBr,  $\text{cm}^{-1}$ ]: 1670 (C=O stretch), 1271, 1501, 1057, 800, 1238, 936, 1436, 1028.

**Neopinone:** NMR [ $^1\text{H}$ , 400 MHz,  $\text{CDCl}_3$ ,  $\delta(\text{ppm})$ ]: 1.88 (t, 1H,  $J = 15$  Hz,  $15\alpha\text{-H}$ ), 1.92 (tt, 1H,  $J = 10$  Hz,  $15\beta\text{-H}$ ), 2.31 (m, 2H,  $16\text{-H}_2$ ), 2.48 (s, 3H,  $N\text{-CH}_3$ ), 2.77 (d, 1H,  $J = 6$  Hz,  $10\alpha\text{-H}$ ), 3.27 (d, 1H,  $J = 10$  Hz,  $10\beta\text{-H}$ ), 3.33 (br. s, 1H,  $7\alpha\text{-H}$ ), 3.64 (d, 1H,  $J = 6$  Hz,  $9\text{-H}$ ), 3.91 (s, 3H,  $3\text{-O-CH}_3$ ), 3.95 (d, 1H,  $J = 15$  Hz,  $7\beta\text{-H}$ ), 5.00 (s, 1H,  $5\text{-H}$ ), 5.50 (d, 1H,  $J = 5$  Hz,  $8\text{-H}$ ), 6.69 (d, 1H,  $J = 8$  Hz,  $2\text{-H}$ ), 6.72 (d, 1H,  $J = 8$  Hz,  $1\text{-H}$ ).

FT-IR [ATR,  $\text{cm}^{-1}$ ]: 1051, 1256, 750, 1440, 1504, 1155, 1730 (C=O stretch), 1607.
